# Supplementary material for: Participation shifts explain degree distributions in a human communications network
Source: PLoS One. 2019 May 23;14(5):e0217240. doi: 10.1371/journal.pone.0217240 (PMC6532894; doi:10.1371/journal.pone.0217240)
Supplement: S1 File — The files include variables needed to replicate the analysis. These can be matched with S2 File for analysis of edge dynamics. (CSV) [file pone.0217240.s001.csv]

	Cell	grade	years	payrank	SA	id
7	FIRES	O-4	21.6	0.842074317968015	0.4	1
8	FIRES	E-6	10	0.381349952963311	0.425	2
5	FIRES	O-4	15	0.818438381937912	0.38	3
32	PROTECTION	O-3	5	0.591603951081844	0.48	4
33	PROTECTION	E-3	0.6	0.206608654750706	0.509661699701363	5
9	FIRES	O-5	20	0.964134524929445	0.525	6
44	SUSTAINMENT	O-4	17	0.83349012229539	0.53	7
10	FIRES	O-4	20.8	0.798981474781098	0.44	8
11	FIRES	O-4	19.5	0.842074317968015	0.43	9
34	PROTECTION	O-3	10.3	0.671095954844779	0.585	10
3	COMMAND	O-6	17.1	1	0.485	11
31	MANEUVER	O-4	9.8	0.70637347130762	0.425	12
26	MANEUVER	O-4	21.7	0.842074317968015	0.445	13
27	MANEUVER	O-4	11	0.754703668861712	0.575	14
16	INTEL	O-5	22.4	0.993179680150517	0.355	15
28	MANEUVER	O-5	19	0.938617121354657	0.53	16
12	FIRES	O-3	16.7	0.721425211665099	0.605	17
13	FIRES	O-5	22.1	0.964134524929445	0.46	18
29	MANEUVER	O-4	21	0.842074317968015	0.445	19
45	SUSTAINMENT	O-3	10.8	0.671095954844779	0.47	20
15	INTEL	O-5	22	0.993179680150517	0.55	21
2	COMMAND	O-5	21.7	0.964134524929445	0.445	22
46	SUSTAINMENT	O-5	23	0.964134524929445	0.495	23
49	SIGNAL	O-5	19.5	0.938617121354657	0.535	24
37	SPECIAL	O-5	11	0.795507996237065	0.48	25
38	SPECIAL	O-4	5	0.631467544684854	0.59	26
39	SPECIAL	O-4	10	0.754703668861712	0.535	27
40	SPECIAL	O-4	19.3	0.842074317968015	0.49	28
17	INTEL	E-5	6	0.313029162746943	0.25	29
18	INTEL	W-4	1.8	0.458254938852305	0.455	30
19	INTEL	O-5	23	0.993179680150517	0.235	31
14	INTEL	E-2	0.8	0.196495766698024	0.105	32
20	INTEL	O-5	19	0.938617121354657	0.535	33
21	INTEL	O-5	20.5	0.964134524929445	0.51	34
47	SUSTAINMENT	O-5	21	0.964134524929445	0.55	35
41	SPECIAL	O-4	23	0.842074317968015	0.44	36
35	PROTECTION	O-5	23	0.993179680150517	0.535	37
36	PROTECTION	O-5	26	0.993179680150517	0.575	38
42	SPECIAL	O-4	12	0.792333019755409	0.405	39
43	SPECIAL	O-5	13.4	0.823024459078081	0.53	40
30	MANEUVER	O-4	14.9	0.818438381937912	0.495	41
48	SUSTAINMENT	O-4	15	0.818438381937912	0.32	42
22	LNO	O-3	10	0.671095954844779	0.42	43
60	BCT.LNO	E-5	12	0.354186265286924	0.37	44
61	BCT.LNO	E-4	1.6	0.228833490122295	0.375	45
62	BCT.LNO	E-6	18	0.422036688617121	0.39	46
63	BCT.LNO	E-5	3.8	0.279280338664158	0.21	47
64	BCT.LNO	W-1	15	0.508466603951082	0.16	48
65	BCT.LNO	E-6	8	0.369590780809031	0.49	49
55	BCT.FIRES	E-4	8	0.277869238005644	0.16	50
56	BCT.FIRES	E-4	NA	0.480832549388522	0.41	51
67	BCT.MANEUVER	O-4	13	0.792333019755409	0.677725125880248	52
68	BCT.MANEUVER	E-7	17.8	0.480832549388523	0.295	53
53	BCT.COMMAND	O-5	19.2	0.938617121354657	0.82	54
57	BCT.FIRES	O-3	7	0.619825964252117	0.615	55
54	BCT.FIRES	W-2	16	0.561265286923801	0.55	56
52	BCT.COMMAND	O-4	20	0.842074317968015	0.5	57
69	BCT.MANEUVER	E-2	0.6	0.196495766698024	0.596412373127179	58
70	BCT.MANEUVER	E-3	0.5	0.206608654750706	0.22	59
50	BCT.COMMAND	O-3	9	0.65098777046096	0.475	60
58	BCT.INTEL	E-6	4.6	0.325964252116651	0.116058267766036	61
51	BCT.COMMAND	O-4	14.9	0.818438381937912	0.71	62
66	BCT.LNO	E-4	2.3	0.240592662276576	0.135	63
59	BCT.INTEL	E-5	5	0.292450611476952	0.41	64
71	UK.COMMAND	O-5	NA	0.798981474781098	0.459999999999999	65
72	UK.COMMAND	O-4	NA	0.953710018814676	0	66
93	UK.LNO	O-3	8.4	0.65098777046096	0.535	67
94	UK.LNO	O-3	8.4	0.65098777046096	0.31	68
1	HICON	O-4	14	0.818438381937912	0.405	69
4	COMMAND	O-5	33	0.993179680150517	0.475	70
6	FIRES	O-5	21.9	0.964134524929445	0.515	71
23	LNO	O-5	24	0.993179680150517	0.585	72
24	LNO	E-6	9	0.369590780809031	0.52	73
25	LNO	O-3	7.3	0.619825964252117	0.545	74
73	UK.COMMAND	E-6	22	0.422036688617121	0.275	75
74	UK.INTEL	W-2	18	0.577022577610536	0.515	76
75	UK.INTEL	E-4	8	0.277869238005644	0.51	77
76	UK.MANEUVER	O-3	8.3	0.65098777046096	0.395	78
77	UK.MANEUVER	O-4	37.5	0.842074317968015	0.283	79
78	UK.MANEUVER	O-3	7.5	0.619825964252117	0.49	80
79	UK.MANEUVER	O-3	3	0.542568203198495	0.2	81
80	UK.FIRES	O-4	15.4	0.818438381937912	0.495	82
81	UK.FIRES	O-4	11	0.754703668861712	0.455	83
82	UK.FIRES	O-2	8	0.547154280338664	0.415	84
83	UK.FIRES	W-2	1.7	0.370296331138288	0.075	85
84	UK.FIRES	O-4	NA	0.798981474781098	0.24	86
85	UK.SPECIAL	O-4	27	0.842074317968015	0.415	87
86	UK.SPECIAL	O-4	11	0.754703668861712	0.57	88
87	UK.SPECIAL	O-4	10.2	0.754703668861712	0.445	89
88	UK.SPECIAL	O-3	2.3	0.502704609595484	0.53	90
89	UK.SPECIAL	O-4	11	0.754703668861712	0.25	91
90	UK.SPECIAL	O-3	6.2	0.619825964252117	0.335	92
91	UK.SPECIAL	O-3	6.4	0.619825964252117	0.525	93
92	UK.SPECIAL	O-3	1	0.443438381937912	0.49	94
